# Supplementary material
Source: PubMed Central journal article supplement (PMC1243798)

**Supplementary Table 1. List of 3097 human and 1106 mouse putative SA gene pairs (examples)<sup>a</sup>**

| Genome | Genomic locus<br>(chromosome_start_end) | Subtype<br>(i.e., overlapping<br>pattern) | Evolutionarily<br>conserved? | Same-<br>overlapping-<br>pattern<br>conserved? | Co-<br>expressed? | Inversely<br>expressed? |
|--------|-----------------------------------------|-------------------------------------------|------------------------------|------------------------------------------------|-------------------|-------------------------|
| Human  | Chr1_100310729_100355822                | 3'-to-3'                                  |                              |                                                | YES               | YES                     |
| Human  | Chr1_109070564_109113188                | 5'-to-5'                                  |                              |                                                | YES               | YES                     |
| Human  | Chr1_111441837_111459073                | 5'-to-5'                                  |                              |                                                | YES               |                         |
| Human  | Chr1_112929084_112955403                | embedded                                  |                              |                                                |                   |                         |
| Human  | Chr1_142173665_142565230                | embedded                                  |                              |                                                | YES               | YES                     |
| Human  | Chr1_142996653_143005120                | 3'-to-3'                                  |                              |                                                | YES               |                         |
| Human  | Chr1_143065032_143078007                | 3'-to-3'                                  |                              |                                                | YES               | YES                     |
| Human  | Chr1_147767626_147793914                | 3'-to-3'                                  | YES                          | YES                                            | YES               |                         |
| Human  | Chr1_150444225_150456552                | 3'-to-3'                                  | YES                          | YES                                            | YES               | YES                     |
| Human  | Chr1_152442305_152521871                | 5'-to-5'                                  |                              |                                                | YES               |                         |
| Human  | Chr1_152528661_152640081                | 3'-to-3'                                  |                              |                                                |                   |                         |
| Human  | Chr1_152976342_152995660                | 5'-to-5'                                  |                              |                                                |                   |                         |
| Human  | Chr1_157071842_157141815                | 5'-to-5'                                  |                              |                                                | YES               | YES                     |
| Human  | Chr1_157900963_157915531                | 3'-to-3'                                  |                              |                                                | YES               | YES                     |
| Human  | Chr1_162363106_162410863                | 5'-to-5'                                  |                              |                                                |                   |                         |
|        |                                         |                                           |                              |                                                |                   |                         |
| Mouse  | Chr1_106511158_106687250                | embedded                                  |                              |                                                | YES               |                         |
| Mouse  | Chr1_125703338_125743510                | 3'-to-3'                                  | YES                          | YES                                            |                   |                         |
| Mouse  | Chr1_127568817_127613413                | 3'-to-3'                                  |                              |                                                |                   |                         |
| Mouse  | Chr1_127788756_127938649                | embedded                                  |                              |                                                | YES               | YES                     |
| Mouse  | Chr1_131880183_131940253                | 3'-to-3'                                  | YES                          | YES                                            | YES               | YES                     |
| Mouse  | Chr1_161999680_162493023                | embedded                                  |                              |                                                | YES               | YES                     |
| Mouse  | Chr1_163945094_164010548                | 3'-to-3'                                  | YES                          | YES                                            | YES               | YES                     |
| Mouse  | Chr1_164325043_164475058                | 3'-to-3'                                  | YES                          | YES                                            | YES               | YES                     |
| Mouse  | Chr1_170274606_170292777                | 5'-to-5'                                  |                              |                                                |                   |                         |
| Mouse  | Chr1_171285202_171293746                | 3'-to-3'                                  | YES                          | YES                                            |                   | YES                     |
| Mouse  | Chr1_171574027_171575982                | 5'-to-5'                                  |                              |                                                |                   |                         |
| Mouse  | Chr1_178334982_178339881                | 3'-to-3'                                  | YES                          | YES                                            | YES               | YES                     |
| Mouse  | Chr1_180217468_180268637                | 3'-to-3'                                  |                              |                                                | YES               |                         |
| Mouse  | Chr1_191218119_191289206                | 3'-to-3'                                  |                              |                                                | YES               | YES                     |
| Mouse  | Chr1_193067170_193095188                | 3'-to-3'                                  | YES                          | YES                                            |                   |                         |

<sup>a</sup>These 30 putative SA gene pairs are presented here as examples. The full list is available from the authors upon request.

**Supplementary Table 2.** Analysis of the sense-antisense (SA) pairs of which both partners have roughly full-length, curated reference sequences (RefSeq).

**a.** Comparison of the prevalence of different subtypes of the putative SA pairs

| Genome | Total pairs | 3'-to-3'<br>(percentage) | 5'-to-5'<br>(percentage) | Embedded<br>(percentage) | Ratio of<br>3'-to-3' / 5'-to-5'<br>( $\chi^2$ -test) |
|--------|-------------|--------------------------|--------------------------|--------------------------|------------------------------------------------------|
| Human  | 693         | 419 (60.5%)              | 160 (23.1%)              | 114 (16.4%)              | 2.6 ( $P < 10^{-4}$ )                                |
| Mouse  | 385         | 274 (71.2%)              | 83 (21.6%)               | 28 (7.2%)                | 3.3 ( $P < 10^{-4}$ )                                |

**b.** Comparison of the evolutionary conservation rates of different subtypes of the putative SA pairs<sup>a</sup>

| Genome | Putative SA subtype | Rate of conservation | Rate of same-overlapping-pattern conservation | Ratio of 3'-to-3' / 5'-to-5' in conservation rate ( $\chi^2$ -test) |
|--------|---------------------|----------------------|-----------------------------------------------|---------------------------------------------------------------------|
| Human  | 3'-to-3'            | 44.4% (186/419)      | 43.9% (184/419)                               | 3.4; 5.4<br>( $P < 10^{-4}$ ; $P < 10^{-4}$ )                       |
|        | 5'-to-5'            | 13.1% (21/160)       | 8.1% (13/160)                                 |                                                                     |
|        | embedded            | 8.8% (10/114)        | 2.6% (3/114)                                  |                                                                     |
|        | whole               | 31.3% (217/693)      | 28.9% (200/693)                               |                                                                     |
| Mouse  | 3'-to-3'            | 63.1% (173/274)      | 60.2% (165/274)                               | 3.1; 5.0<br>( $P < 10^{-4}$ ; $P < 10^{-4}$ )                       |
|        | 5'-to-5'            | 20.5% (17/83)        | 12.0% (10/83)                                 |                                                                     |
|        | embedded            | 21.4% (6/28)         | 7.1% (2/28)                                   |                                                                     |
|        | whole               | 50.9% (196/385)      | 46.0% (177/385)                               |                                                                     |

<sup>a</sup>Note that, all  $p$ -values far less than  $10^{-4}$  are also shown as  $P < 10^{-4}$ . Rate of conservation refers to the percentage of human or mouse putative SA pairs conserved as putative SA in the mouse or human genome. Rate of same-overlapping-pattern conservation refers to the percentage of human or mouse putative SA pairs conserved as putative SA with the same overlapping pattern (i.e., 3'-to-3', 5'-to-5' or embedded) in the mouse or human genome.

**Supplementary Table 3.** Comparison of subtype proportions in different putative SA pair sets in which at least the antisense in a given SA pair belongs to non-coding RNA<sup>a</sup>

| Putative SA pair set            | Genome | Total pairs<br>(SA pairs in which the sense also belongs to non-coding RNA) <sup>b</sup> | 3'-to-3'<br>(percentage) | 5'-to-5'<br>(percentage) | Embedded<br>(percentage) | Ratio of 3'-to-3' / 5'-to-5' <sup>c</sup> |
|---------------------------------|--------|------------------------------------------------------------------------------------------|--------------------------|--------------------------|--------------------------|-------------------------------------------|
| The whole                       | Human  | 1953 (209)                                                                               | 507 (26.0)               | 363 (18.6)               | 1083 (55.4)              | 1.4                                       |
|                                 | Mouse  | 469 (46)                                                                                 | 152 (32.4)               | 101 (21.5)               | 216 (46.1)               | 1.5                                       |
| Inversely expressed             | Human  | 399 (20)                                                                                 | 127 (31.8)               | 72 (18.1)                | 200 (50.1)               | 1.8                                       |
|                                 | Mouse  | 105 (12)                                                                                 | 43 (41.0)                | 20 (19.0)                | 42 (40.0)                | 2.2                                       |
| Co-expressed                    | Human  | 487 (21)                                                                                 | 158 (32.4)               | 69 (14.2)                | 260 (53.4)               | 2.9                                       |
|                                 | Mouse  | 127 (18)                                                                                 | 59 (46.5)                | 25 (19.7)                | 43 (33.8)                | 2.4                                       |
| Conserved                       | Human  | 99 (0)                                                                                   | 62 (62.6)                | 17 (17.2)                | 20 (20.2)                | 3.6                                       |
|                                 | Mouse  | 82 (0)                                                                                   | 65 (79.3)                | 7 (8.5)                  | 10 (12.2)                | 9.3                                       |
| Conserved & inversely expressed | Human  | 27 (0)                                                                                   | 17 (63.0)                | 4 (14.8)                 | 6 (22.2)                 | 4.3                                       |
|                                 | Mouse  | 22 (0)                                                                                   | 18 (81.8)                | 2 (9.1)                  | 2 (9.1)                  | 9.0                                       |
| Conserved & co-expressed        | Human  | 32 (0)                                                                                   | 27 (84.4)                | 2 (6.3)                  | 3 (9.3)                  | 13.5                                      |
|                                 | Mouse  | 33 (0)                                                                                   | 29 (87.9)                | 3 (9.1)                  | 1 (3.0)                  | 9.7                                       |

<sup>a</sup>The co-expressed putative SA pairs were defined as those in which the two partners are coordinately expressed in the same tissues more often than expected by chance; the inversely expressed putative SA pairs were defined as those with both an inverse expression pattern between two partners and a significantly greater change of the relative expression ratio of sense to antisense between two states of the same tissues than expected by chance; the conserved putative SA pairs are the pairs conserved as putative SA form in both human and mouse genomes. See Materials and Methods for more details. Because many non-coding antisense genes have only partial EST sequences, the proportion of “embedded” putative SA pairs is seriously overestimated here. In fact, a large proportion of the “embedded” putative SA pairs are also mainly overlapping at the 3' UTRs of the sense genes (data not shown).

<sup>b</sup>According to our definition (see Materials and Methods), for the SA pairs in which one member has CDS while the other lacks CDS, we define the first one as the S and the latter one as the A. Thus, in a given SA pair, once the sense belongs to non-coding RNA, the antisense partner must be non-coding RNA as well.

<sup>c</sup>The slight differences between the “Ratios of 3'-to-3' / 5'-to-5'” in this Table and those in Table 3 probably due to the fact that many non-coding antisense genes have only partial EST sequences and thus are included in “embedded” putative SA pairs, although a large proportion of them are indeed overlapping at the 3' UTRs of the sense genes.

**Supplementary Table 4.** Analysis of orthologous genes between mammals and birds (and/or amphibians) that contain highly conserved regions (HCRs) in their noncoding sequences<sup>a</sup>

| Gene list                      | Gene symbol | Mammalian genes <sup>b</sup> |            |                             |                                                         |                                                                                                            | Orthologous bird and/or amphibian genes (chicken; African clawed frog) <sup>b</sup> |                                                                                   |
|--------------------------------|-------------|------------------------------|------------|-----------------------------|---------------------------------------------------------|------------------------------------------------------------------------------------------------------------|-------------------------------------------------------------------------------------|-----------------------------------------------------------------------------------|
|                                |             | Gene ID <sup>c</sup>         | Species    | Gene category               | Overlapping pattern of putative SA pair (Genomic locus) | Overlapping area of the target gene includes HCR? (overlapping area; target gene with overlapping partner) | Gene ID <sup>c</sup>                                                                | Gene category                                                                     |
| <b>3'-HCR-containing genes</b> |             |                              |            |                             |                                                         |                                                                                                            |                                                                                     |                                                                                   |
| 1                              | ATP2A2      | X53754                       | pig        | unknown; human ortholog NBD |                                                         |                                                                                                            | M66385                                                                              | NBD                                                                               |
| 2                              | DMD         | M18533                       | human      | NOB                         |                                                         |                                                                                                            | X13369                                                                              | NBD                                                                               |
| 3                              | BTG1        | X61123                       | human      | NBD                         |                                                         |                                                                                                            | X64146                                                                              | NBD                                                                               |
| 4                              | Ncam1       | X15051                       | mouse      | <b>SA</b>                   | <b>3'-to-3'</b><br>(chr9_49625979_49925346)             | <b>No</b><br>(CDS; NM_010875 with BC049643)                                                                | M15861;<br>M25696                                                                   | NBD; NBD                                                                          |
| 5                              | Nmyc1       | X53674                       | Wood chuck | unknown; mouse ortholog NBD |                                                         |                                                                                                            | D90071                                                                              | NBD                                                                               |
| 6                              | CALD1       | M64110                       | human      | NOB                         |                                                         |                                                                                                            | J04968                                                                              | NBD                                                                               |
| 7<br>[same gene as 87]         | FOS         | K00650                       | human      | NBD                         |                                                         |                                                                                                            | M37000                                                                              | NBD                                                                               |
| 8                              | ATP1B1      | X03747                       | human      | <b>SA</b>                   | <b>3'-to-3'</b><br>(Chr1_16580760_4_166068844)          | <b>Yes<sup>d</sup></b><br>(3' UTR; X03747 with NM_013330)                                                  | J02787                                                                              | <b>SA</b><br>(J02787 overlapping with BX936183 at 3' UTR including HCR; 3'-to-3') |
| 9                              | H3f3b       | X13605                       | mouse      | NBD                         |                                                         |                                                                                                            | M11393                                                                              | NBD                                                                               |
| 10                             | Calm2       | M17069                       | rat        | NBD; mouse ortholog NBD     |                                                         |                                                                                                            | L00101;<br>K01945                                                                   | NBD; NBD                                                                          |
| 11                             | HMG2        | X13546                       | human      | <b>SA</b>                   | <b>embedded</b><br>(Chr1_26483055_26486605)             | <b>Yes</b><br>(3' UTR; NM_005517 with BU674882)                                                            | J03229                                                                              | NBD                                                                               |
| 12                             | H3F3A       | X05857                       | human      | NBD                         |                                                         |                                                                                                            | M11667                                                                              | NBD                                                                               |
| 13                             | Marcks      | M24638                       | cow        | NBD; human ortholog NBD     |                                                         |                                                                                                            | M31650                                                                              | NBD                                                                               |
| 14                             | COL1A2      | K01078                       | human      | NBD                         |                                                         |                                                                                                            | M25984                                                                              | NBD                                                                               |
| 15                             | NEF3        | Y00067                       | human      | <b>SA</b>                   | <b>5'-to-5'</b><br>(chr8_24826429_24832512)             | <b>No</b><br>(5' UTR+CDS; NM_005382 with BC002421)                                                         | X17102                                                                              | NBD                                                                               |
| 16                             | Tfrc        | M58040                       | rat        | NBD; mouse ortholog NBD     |                                                         |                                                                                                            | X13753                                                                              | NBD                                                                               |
| 17<br>[same gene as 76]        | JUN         | J04111                       | human      | NBD                         |                                                         |                                                                                                            | X15547                                                                              | NBD                                                                               |
| 18                             | GATA-3      | X58072                       | human      | NBD                         |                                                         |                                                                                                            | ; M76565                                                                            | ; NBD                                                                             |
| 19                             | CDH2        | X57548                       | human      | NBD                         |                                                         |                                                                                                            | X07277                                                                              | NBD                                                                               |
| 20                             | CALB1       | X06661                       | human      | NBD                         |                                                         |                                                                                                            | X06633                                                                              | NBD                                                                               |
| 21                             | Nsep1       | M57299                       | rat        | NBD; mouse ortholog NBD     |                                                         |                                                                                                            | ; M59453                                                                            | ; NBD                                                                             |
| 22                             | Lamp1       | M32015                       | mouse      | NBD                         |                                                         |                                                                                                            | M59365                                                                              | NBD                                                                               |

|                         |         |        |                    |                             |                                                 |                                                                     |                   |                        |
|-------------------------|---------|--------|--------------------|-----------------------------|-------------------------------------------------|---------------------------------------------------------------------|-------------------|------------------------|
| 23                      | ODC1    | X16277 | human              | <b>SA</b>                   | <b>embedded</b><br>(chr2_10531098_10539051)     | <b>No</b><br>(CDS; NM_002539 with BG185876)                         | X64710;<br>X56316 | NBD; NBD               |
| 24                      | Nfia    | D90173 | mouse              | NOB                         |                                                 |                                                                     | X51486            | NOB                    |
| 25                      | COL2A1  | X06268 | human              | NBD                         |                                                 |                                                                     | L00063;<br>M63596 | NBD; NBD               |
| 26                      | VIM     | M25246 | human              | <b>SA</b>                   | <b>5'-to-5'</b><br>(chr10_17296250_17319891)    | <b>No</b><br>(5' UTR+CDS; NM_003380 with BC078172)                  | V00447;<br>X16843 | NBD; NBD               |
| 27                      | EEF1A1  | J04617 | human              | <b>SA</b>                   | <b>embedded</b><br>(chr6_74283957_74287476_M)   | <b>Yes</b><br>(3' UTR+CDS; NM_001402 with AB019568)                 | ; M25697          | ; NBD                  |
| 28                      | HSPA5   | M19645 | human              | <b>SA</b>                   | <b>embedded</b><br>(chr9_125076680_125083181_M) | <b>Yes</b><br>(3' UTR; NM_005347 with BM969352)                     | M27260            | NBD                    |
| 29                      | Actg    | X52815 | rat                | NBD; mouse ortholog NBD     |                                                 |                                                                     | M26111<br>(goose) | NBD (chicken ortholog) |
| 30                      | Pam     | M25732 | rat                | NBD; mouse ortholog NBD     |                                                 |                                                                     | ; X62771          | ; NBD                  |
| 31                      | Cntn1   | X14943 | mouse              | <b>SA</b>                   | <b>5'-to-5'</b><br>(chr15_92367855_92760915)    | <b>No</b><br>(5' UTR; NM_007727 with BY707228)                      | Y00813            | NBD                    |
| 32                      | TCF12   | M83233 | human              | NBD                         |                                                 |                                                                     | M87337            | NBD                    |
| 33                      | HMGN1   | M21339 | human              | <b>SA</b>                   | <b>5'-to-5'</b><br>(chr21_39635840_39642917)    | <b>No</b><br>(5' UTR; AK056033 with CB853997)                       | X52708            | NBD                    |
| 34                      | PDGFA   | X06374 | human              | NBD                         |                                                 |                                                                     | ; M23238          | ; NBD                  |
| 35<br>[same gene as 83] | RARB    | Y00291 | human              | <b>SA</b>                   | <b>3'-to-3'</b><br>(chr3_25444013_25680792)     | <b>No</b><br>(3' UTR; AI564510 with NM_001068)                      | X57340            | NBD                    |
| 36                      | HAPLN1  | Y00165 | pig                | unknown; human ortholog NBD |                                                 |                                                                     | M13212            | NBD                    |
| 37                      | ACTC    | J00073 | human              | NBD                         |                                                 |                                                                     | M10607            | NBD                    |
| 38                      | MYB     | M15024 | human              | <b>SA</b>                   | <b>embedded</b><br>(chr6_135544145_135582003)   | <b>Probably Yes<sup>e</sup></b><br>(3' UTR; AJ606321 with BX090126) | X51569            | NBD                    |
| 39                      | ACTA1   | M20543 | human              | NBD                         |                                                 |                                                                     | J00805            | NBD                    |
| 40                      | MAPK1   | M84489 | human              | NBD                         |                                                 |                                                                     | ; X59813          | ; NBD                  |
| 41<br>[same gene as 78] | Tpm1    | M18135 | rat                | NBD; mouse ortholog NBD     |                                                 |                                                                     | M69145            | NBD                    |
| 42                      | MYH10   | X62659 | (sequence deleted) |                             |                                                 |                                                                     | M26510            | NBD                    |
| 43<br>[same gene as 77] | ACTB    | X00351 | human              | <b>SA</b>                   | <b>3'-to-3'</b><br>(chr7_5340018_5343473)       | <b>Yes</b><br>(3' UTR; NM_001101 with CA439838)                     | X00182            | NBD                    |
| 44                      | HMGB2   | M83665 | human              | NBD                         |                                                 |                                                                     | M83235            | NBD                    |
| 45                      | Npm1    | J03969 | rat                | NBD; mouse ortholog NBD     |                                                 |                                                                     | X17200;<br>X56039 | NBD; NBD               |
| 46                      | FGFR1   | M37722 | human              | NBD                         |                                                 |                                                                     | M24637;<br>M55163 | NBD; NBD               |
| 47                      | POU2F1  | X13403 | human              | NBD                         |                                                 |                                                                     | M29972;<br>X57165 | NBD; NBD               |
| 48                      | NCL     | M60858 | human              | NBD                         |                                                 |                                                                     | X17199;<br>X63091 | NBD; NBD               |
| 49                      | CSNK2A1 | M55265 | human              | NBD                         |                                                 |                                                                     | M59456            | NBD                    |
| 50                      | GNAI1   | X03642 | cow                | NBD; human ortholog NBD     |                                                 |                                                                     | ; X56089          | ; NBD                  |

|                                |        |        |                   |                                |                                                     |                                                       |                            |             |
|--------------------------------|--------|--------|-------------------|--------------------------------|-----------------------------------------------------|-------------------------------------------------------|----------------------------|-------------|
| 51                             | ACTN1  | X55187 | human             | NBD                            |                                                     |                                                       | M74143                     | NBD         |
| 52                             | Twist1 | M63650 | mouse             | NBD                            |                                                     |                                                       | ; M27730                   | ; NBD       |
| 53                             | Ngfb   | M35075 | mouse             | NBD                            |                                                     |                                                       | X04067;<br>X55716          | NBD; NBD    |
| 54<br>[same gene<br>as 66]     | TGFB1  | X02812 | human             | NBD                            |                                                     |                                                       | X12373 (pig,<br>not birds) | -           |
| 55                             | MSX1   | M76732 | human             | NBD                            |                                                     |                                                       | X61922                     | NBD         |
| 56                             | TRA1   | X15187 | human             | <b>SA</b>                      | <b>3'-to-3'</b><br>(chr12_10282662<br>6_102861940)  | <b>No</b><br>(3' UTR; N92597 with<br>BC044618)        | X04961                     | NBD         |
| 57                             | Hoxb4  | M36654 | mouse             | NBD                            |                                                     |                                                       | ; M26884                   | ; NBD       |
| 58                             | TNC    | X56160 | human             | NBD                            |                                                     |                                                       | M23121                     | NBD         |
| 59                             | P4HA1  | M24486 | human             | <b>SA</b>                      | <b>embedded</b><br>(chr10_74435550<br>_74526626)    | <b>No</b><br>(CDS; NM_000917 with<br>BG212501)        | M26217                     | NBD         |
| 60                             | FN1    | X00739 | human             | <b>SA</b>                      | <b>3'-to-3'</b><br>(chr2_216050137<br>_216126297_M) | <b>Yes</b><br>(3' UTR; X00739 with<br>AY450391)       | ; M77820                   | ; NBD       |
| 61                             | ITGB1  | X07979 | human             | NBD                            |                                                     |                                                       | M14049;<br>M20140          | NBD; NBD    |
| 62                             | NPY    | K01911 | human             | NBD                            |                                                     |                                                       | M87295                     | NBD         |
| 63                             | Cyr61  | M32490 | mouse             | NBD                            |                                                     |                                                       | J04496                     | NBD         |
| 64<br>[same gene<br>as 81]     | CKB    | X15334 | human             | NBD                            |                                                     |                                                       | M33714                     | NBD         |
| <b>5'-HCR-containing genes</b> |        |        |                   |                                |                                                     |                                                       |                            |             |
| 65                             | IGF1   | M14155 | human             | NBD                            |                                                     |                                                       | M32791;<br>M29857          | NBD; M29857 |
| 66<br>[same gene<br>as 54]     | TGFB1  | X02812 | human             | NBD                            |                                                     |                                                       | X12373 (pig,<br>not birds) | -           |
| 67                             | ACTA2  | D00618 | human             | <b>SA</b>                      | <b>3'-to-3'</b><br>(chr10_9062960<br>2_90724890)    | <b>No</b><br>(3' UTR+CDS; NM_001613<br>with AK093340) | M13756                     | NBD         |
| 68                             | Col1a2 | K01832 | mouse             | NBD                            |                                                     |                                                       | M25963                     | NBD         |
| 69                             | Nfib   | J04122 | golden<br>hamster | unknown; mouse<br>ortholog NBD |                                                     |                                                       | X51485                     | NBD         |
| 70                             | MYL1   | J05026 | human             | NBD                            |                                                     |                                                       | K02610                     | NBD         |
| 71                             | HOXD4  | X17360 | human             | NBD                            |                                                     |                                                       | X52671                     | NBD         |
| 72                             | Myb    | X16390 | mouse             | NBD                            |                                                     |                                                       | X12495                     | NBD         |
| 73                             | Gabrg2 | M62374 | mouse             | NBD                            |                                                     |                                                       | X54944                     | NBD         |
| 74                             | Hoxb7  | X06762 | mouse             | NBD                            |                                                     |                                                       | ; X06592                   | ; NBD       |
| 75                             | TGFB3  | M60556 | human             | NBD                            |                                                     |                                                       | X58127                     | NBD         |
| 76<br>[same gene<br>as 17]     | JUN    | J04111 | human             | NBD                            |                                                     |                                                       | M57467                     | NBD         |
| 77<br>[same gene<br>as 43]     | ACTB   | M10277 | human             | <b>SA</b>                      | <b>3'-to-3'</b><br>(chr7_5340018_<br>5343473)       | <b>No</b><br>(3' UTR; NM_001101 with<br>CA439838)     | X00182                     | NBD         |
| 78<br>[same gene<br>as 41]     | Tpm1   | M15474 | rat               | NBD; mouse<br>ortholog NBD     |                                                     |                                                       | M69145                     | NBD         |
| 79                             | Hoxc6  | X16511 | mouse             | NBD                            |                                                     |                                                       | X12500                     | NBD         |
| 80                             | Dcn    | X53929 | mouse             | NBD                            |                                                     |                                                       | X63797                     | NBD         |

|                                   |                     |        |       |           |                                                |                                                 |                          |                        |
|-----------------------------------|---------------------|--------|-------|-----------|------------------------------------------------|-------------------------------------------------|--------------------------|------------------------|
| 81<br>[same gene as 64]           | CKB                 | X15334 | human | NBD       |                                                |                                                 | M33714                   | NBD                    |
| 82                                | FGFR2               | X52832 | human | NBD       |                                                |                                                 | M35196                   | NBD                    |
| 83<br>[same gene as 35]           | RARB                | Y00291 | human | <b>SA</b> | <b>3'-to-3'</b><br>(chr3_25444013_25680792)    | <b>No</b><br>(3' UTR; AI564510 with NM_001068)  | X57340                   | NBD                    |
| 84                                | FTH1                | X03488 | human | <b>SA</b> | <b>3'-to-3'</b><br>(chr11_6147393_1_61491681)  | <b>No</b><br>(3' UTR; NM_002032 with NM_004183) | M16343;<br>M15655        | NBD; NBD               |
| 85                                | COL3A1              | M26939 | human | <b>SA</b> | <b>embedded</b><br>(chr2_18966460_4_189703013) | <b>No</b><br>(3' UTR; NM_000090 with CN367234)  | K01481                   | NBD                    |
| 86                                | Hoxa7               | M17192 | mouse | NBD       |                                                |                                                 | M59714<br>(common quail) | NBD (chicken ortholog) |
| <b>Genes with HCRs in introns</b> |                     |        |       |           |                                                |                                                 |                          |                        |
| 87<br>[same gene as 7]            | FOS<br>first intron | K00650 | Human | NBD       |                                                |                                                 | M18043                   | NBD                    |

<sup>a</sup>A total of 87 highly conserved regions (HCRs) in the 3' UTR, 5' UTR and intron of the relevant genes were listed in 'Table 1' of the reference (34), in which a highly conserved region (HCR) was defined as sharing at least 70% identity over 100 nt between corresponding orthologs among vertebrates that diverged more than 300 million years (34,35). As noted in our table, 7 genes have two different HCR regions, so a total of 80 unique mammalian genes have HCRs. These HCR regions are proposed to form long perfect duplexes with (*cis*-encoded) antisense transcripts (23). Our analysis of these HCRs supports this proposal (at least partially).

<sup>b</sup>For genes in the human and mouse genomes, their gene categories were determined by our own gene cluster sets as well as UCSC 'BLAT Search Genome' website (<http://genome.ucsc.edu/cgi-bin/hgBlat?command=start>; Assembly: human May 2004; mouse May 2004). Gene categories of the genes in the other genomes were determined by the UCSC website alone (Assembly: rat Jun 2003; cow Sep. 2004; Chicken Feb. 2004; X. tropicalis Oct. 2004) based on the annotated mRNA sequences. Pig and woodchuck genomes are not available in UCSC website yet. Birds besides chicken (*Gallus gallus*) and amphibian besides African clawed frog (*X. laevis*) were indicated. As *X. laevis* genome is not available yet, *X. tropicalis* genome was used in BLAT searching. SA: sense-antisense gene pair; NOB: non-exon-overlapping bidirectional gene pair; NBD: non-bidirectional gene (14-16). Due to the facts that mouse putative SA pairs were seriously underestimated caused by the limitation of qualified sequences (Sun *et al.* unpublished), and that the putative SA pairs in the remaining non-human genomes are more seriously underestimated because only mRNAs shown in the Blat searching-result plots were considered, the rate of HCRs belonging to or including putative SA overlapping regions as well as the rate of putative SA pairs must be seriously underestimated. Of the 51 human genes with HCRs, 17 form putative SA pairs with their partners (seven 3'-to-3' putative SA pairs, three 5'-to-5' putative SA pairs and seven 'embedded' putative SA pairs). Five out of the seven 'embedded' putative SA pairs are overlapping at the 3' UTRs of the analyzed genes. Indeed, 12 (70.6%) of the 17 human putative SA genes are targeted at their 3' UTRs, of which, 58.3% (7 out of 12) contain HCRs in their putative SA overlapping regions. Notably, ATP1B1 gene form 3'-to-3' putative SA pair with its partner in both human and chicken genomes, whose putative SA overlapping region include the relevant HCR in both genomes. In contrast, only 3 (17.6%) are targeted to their 5' UTRs, but none of them contain 5'-HCRs. Same as some highly conserved miRNAs whose expression levels are very low (38), many antisense genes may be expressed at a very low level and thus could not be detected in the human genome yet. Indeed, even many of the detected human antisense genes have only one or two qualified sequences in our putative SA set, while their sense partners are much more abundant (data not shown). Thus, the rate of putative SA pairs and of HCRs belonging to or including putative SA overlapping regions might be underestimated in the human genome as well. Thus, this study suggests that the 3' UTR-targeted antisense-regulation modes might be much more conserved than 5' UTR-targeted ones, during short (75 million years diverged between humans and mice) or long (over 300 million years diverged between birds and mammals) evolutionary periods.

<sup>c</sup>The GenBank IDs were listed in "Table 1" of the reference (34). As some of them are genomic DNA sequences, we chose their cDNA sequences as representative sequences in putative SA pairs.

**Sun et al.**

<sup>d</sup>The HCR conserved between human mRNA X03747 and chicken mRNA CO421259 (but not J02787) covers all the SA-overlapped 3' UTR of X03747 (about 200 nt).

<sup>e</sup>Because BX090126 is an incomplete EST sequence, it is expected that its full-length mRNA sequence would overlap with the 3' UTR of the sense partner gene, including the HCR region.



**Supplementary Figure 1.** The proportion of SA pairs found in both lineages in simulation as a function of the extension rate for different values of intergenic distance. For Supplementary Figure 1a the re-arrangement rate per unit time is set to 1/500. For Supplementary Figure 1b it is set to 1/1000 and for Supplementary Figure 1c it is 1/5000. We also consider what happens if, for a given re-arrangement rate ( $p=1/1000$ ), the extension rate is different for the two lineages. We consider the extreme possibility that the rate in one lineage might be double that in another (Supplementary Figure 1d). Red lines are for intergenic distance (IGD) of 10 units, green for 50 units, blue for 75 units, magenta for 100 units and black for 150 units. Only instances in which more than 10 overlapping pairs out of 10,000 simulants are incorporated in the analysis.

**Supplementary Figure 1a.**

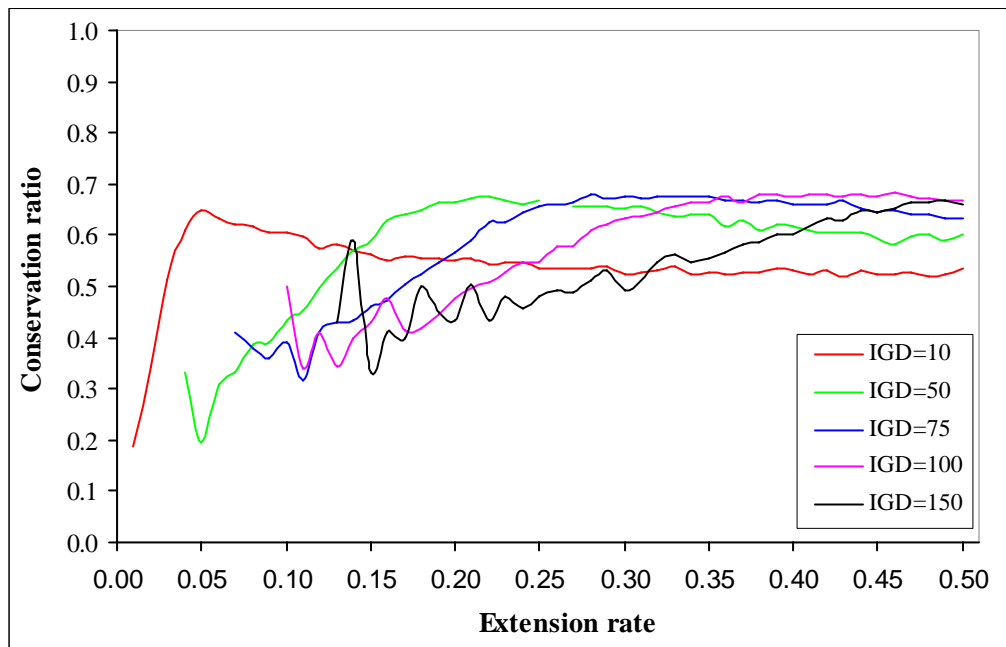

Supplementary Figure 1b.

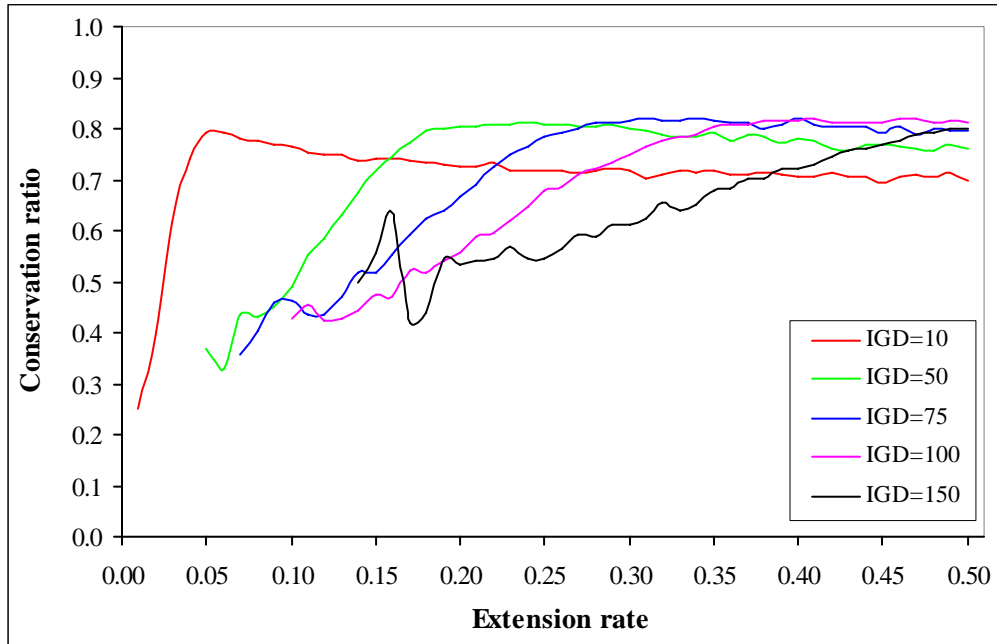

Supplementary Figure 1c.

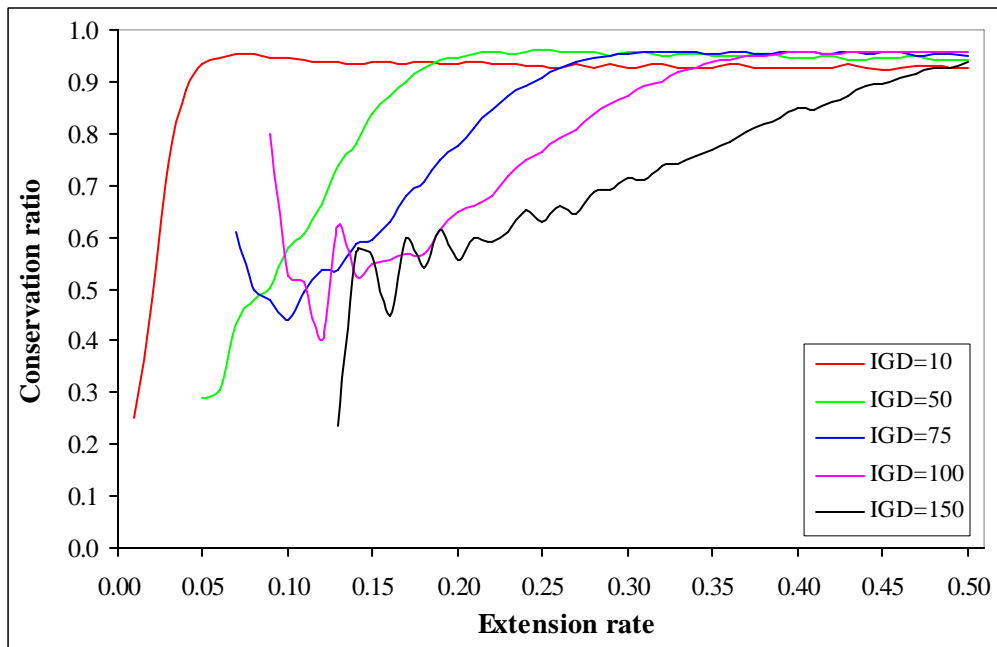

Supplementary Figure 1d.

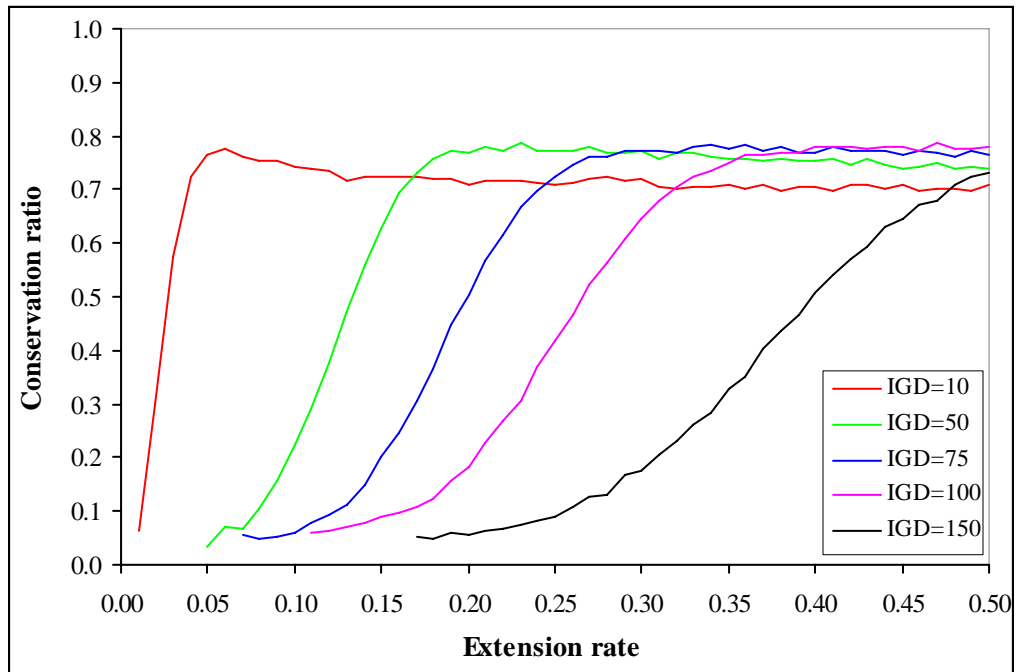

Supplement: nar_33_17_5533__1.pdf [file nar_33_17_5533__1.pdf]
